# Supplementary material for: In situ tailoring bimetallic–organic framework-derived yolk–shell NiS2/CuS hollow microspheres: an extraordinary kinetically pseudocapacitive nanoreactor for an effective sodium-ion storage anode
Source: Royal Society of Chemistry journal article supplement (doi:10.1039/d1ta04386b), 2021-01-01
Supplement: d1ta04386b1.pdf [file d1ta04386b1.pdf]

## Electronic Supplementary Information

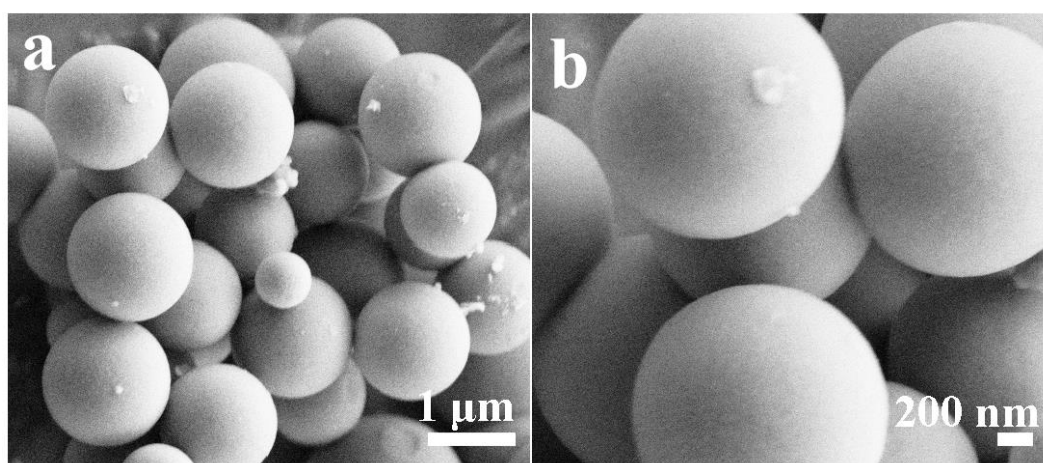

**Fig. S1** (a, b) SEM images of NiZn-MOFs.

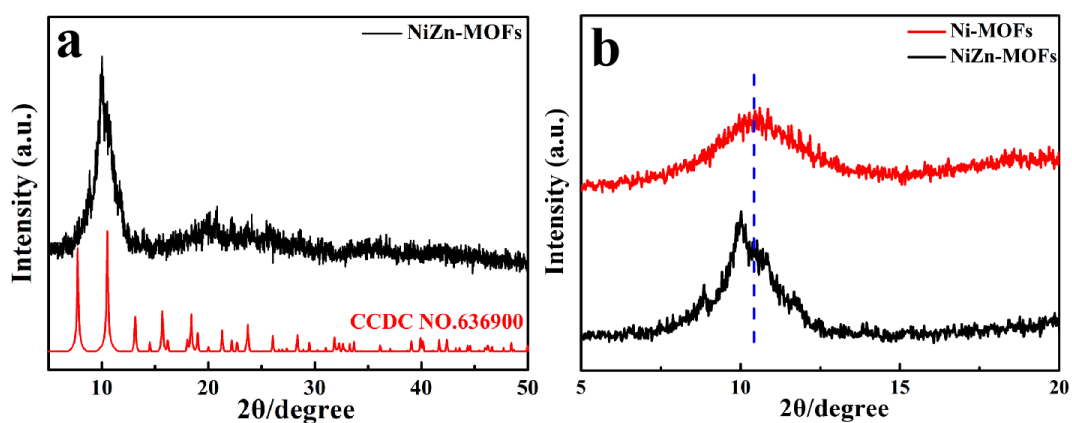

**Fig. S2** (a) XRD pattern of NiZn-MOFs, (b) XRD patterns of NiZn-MOFs and Ni-MOFs from 5° to 20° .

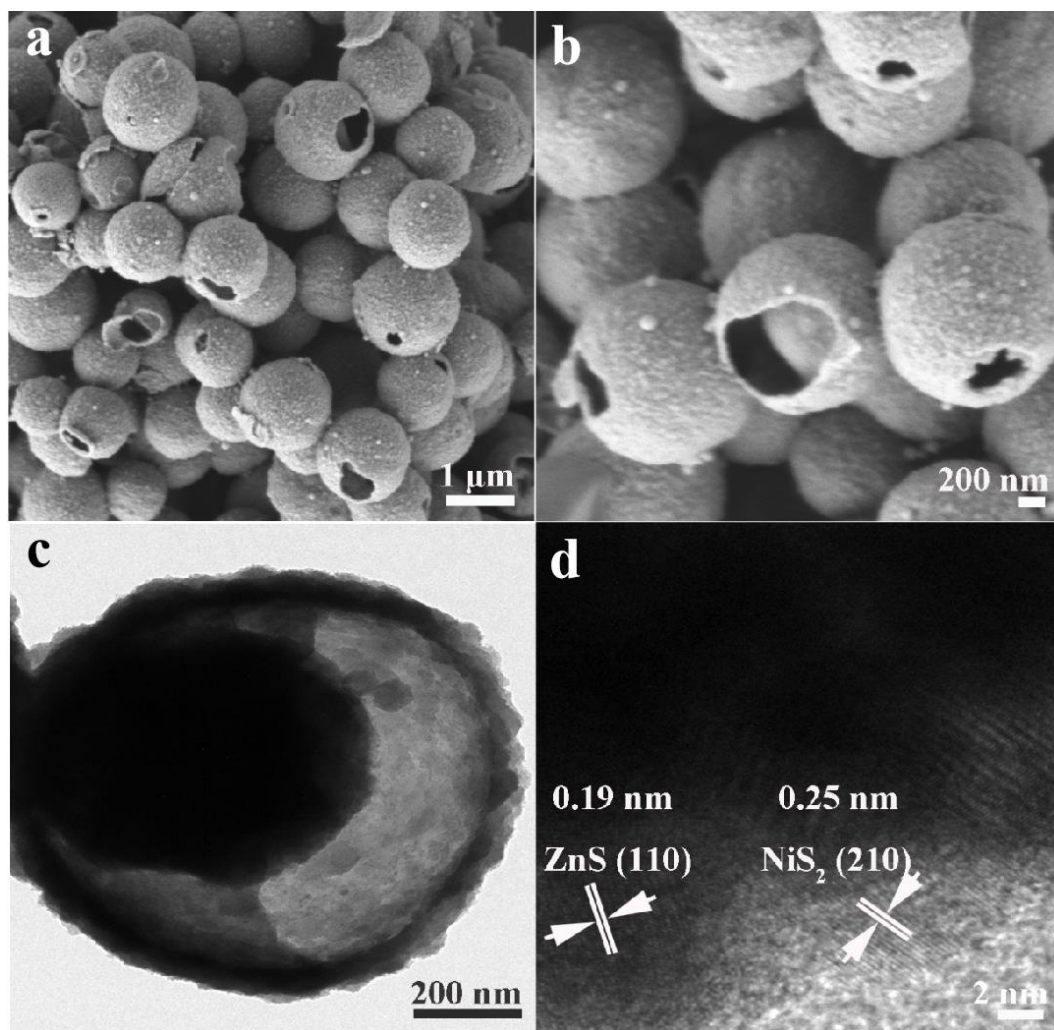

**Fig. S3** FESEM (a, b), TEM (c), and HRTEM (d) images of yolk-shell  $\text{NiS}_2/\text{ZnS}$  hollow microspheres.

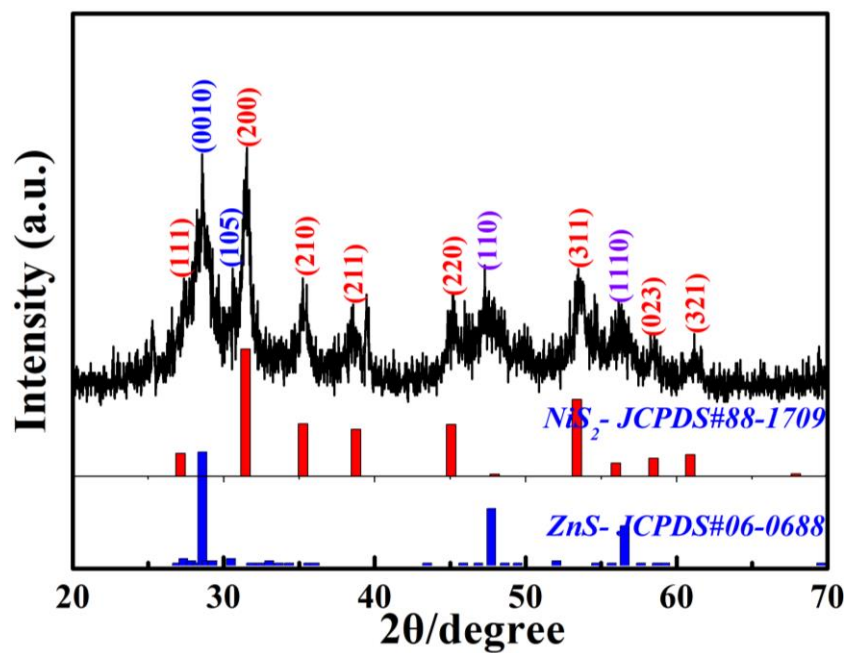

Fig. S4 XRD pattern of yolk-shell NiS<sub>2</sub>/ZnS hollow microspheres.

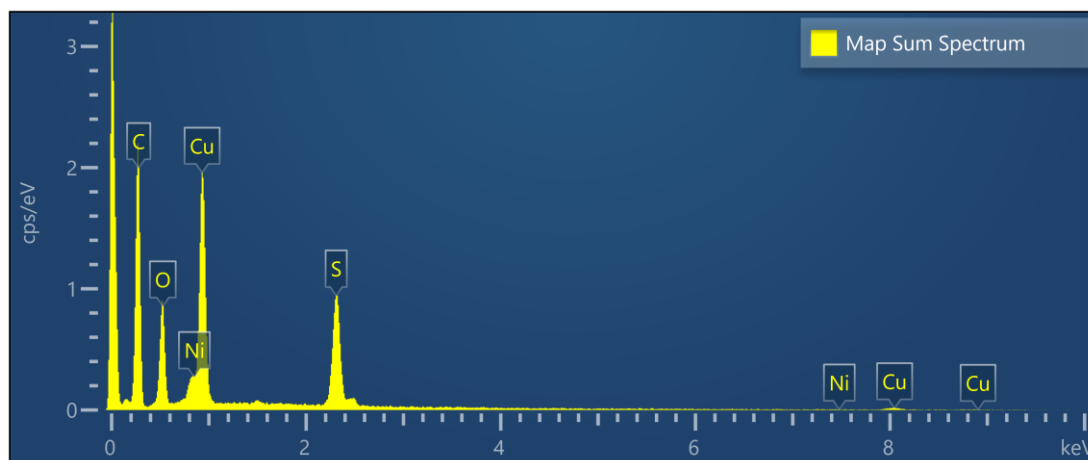

Fig. S5 EDX spectrum of yolk-shell NiS<sub>2</sub>/CuS hollow microspheres.

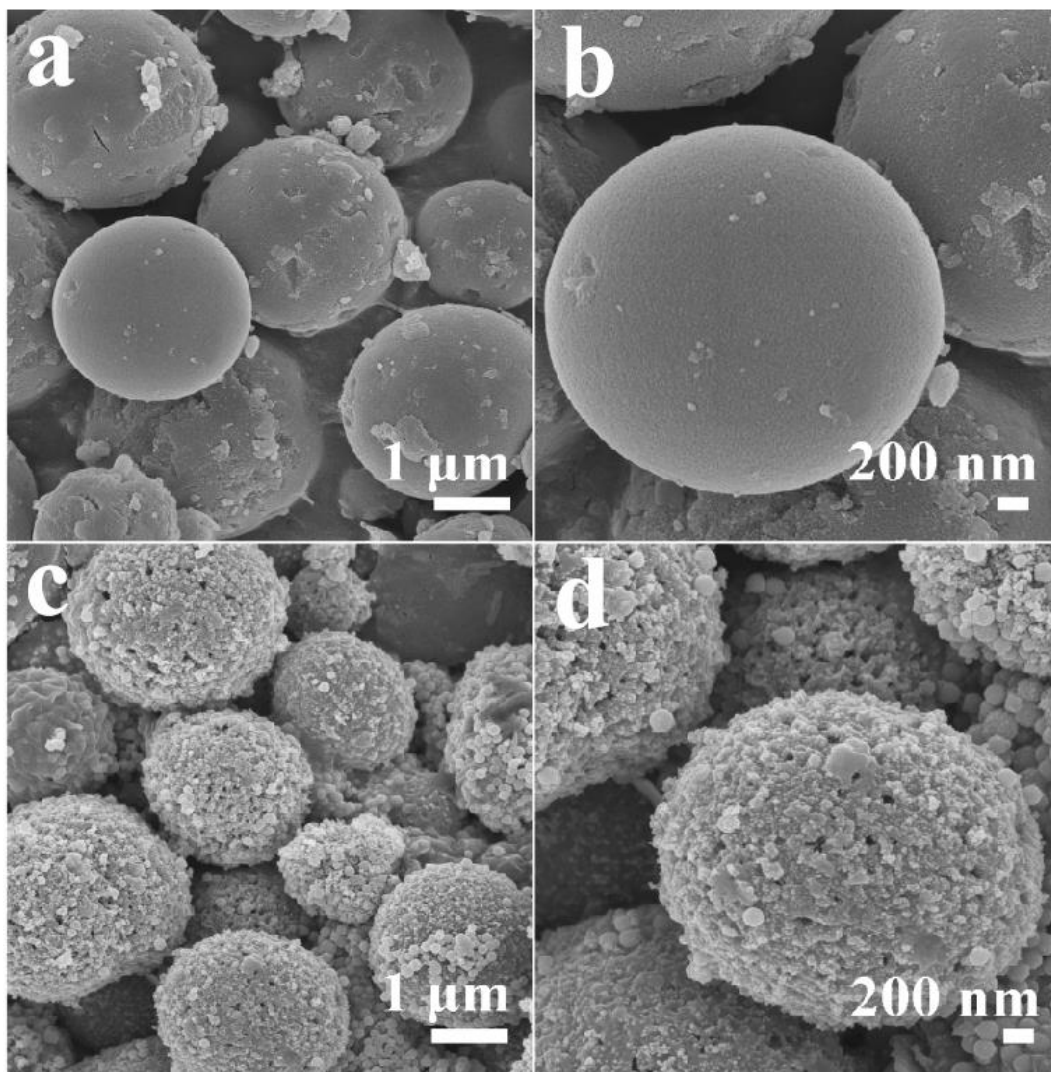

**Fig. S6** SEM images of Ni-MOFs (a, b) and plain NiS<sub>2</sub> microspheres (c, d).

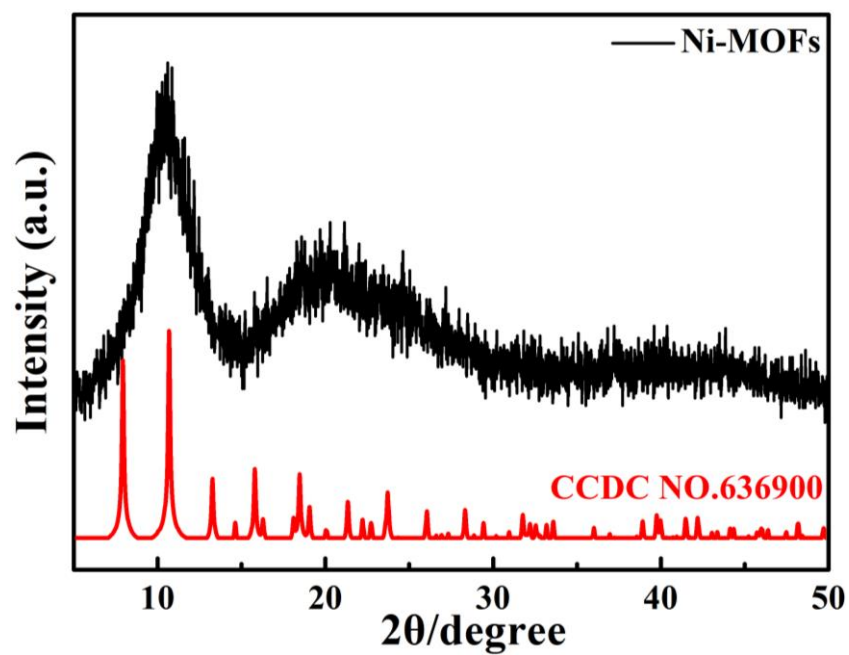

Fig. S7 XRD pattern of Ni-MOFs.

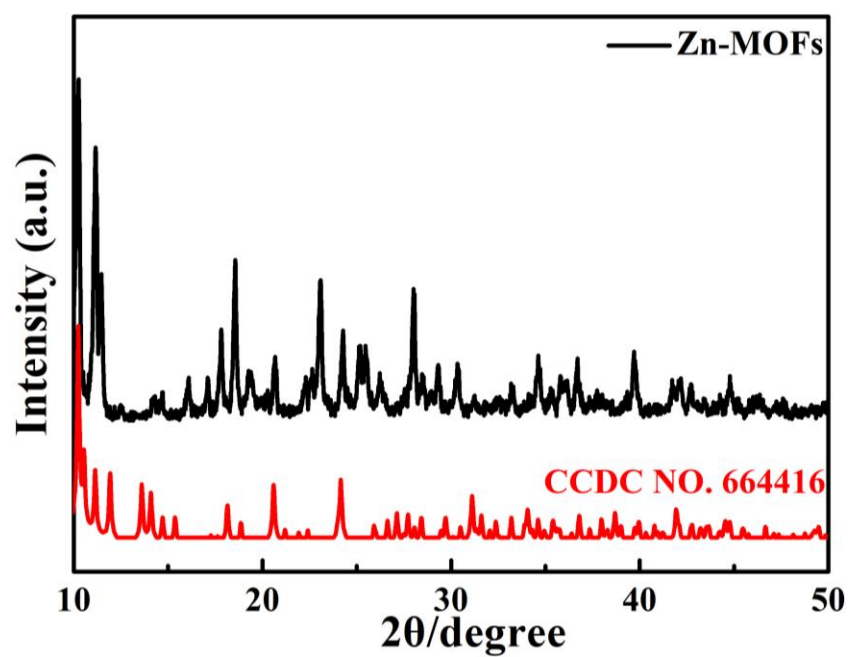

Fig. S8 XRD pattern of Zn-MOFs.

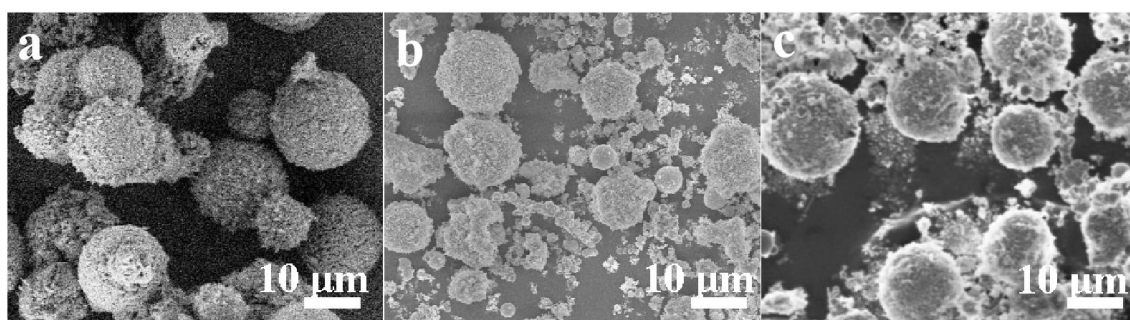

Fig. S9 SEM images of Zn-MOFs (a), ZnS (b), and CuS (c).

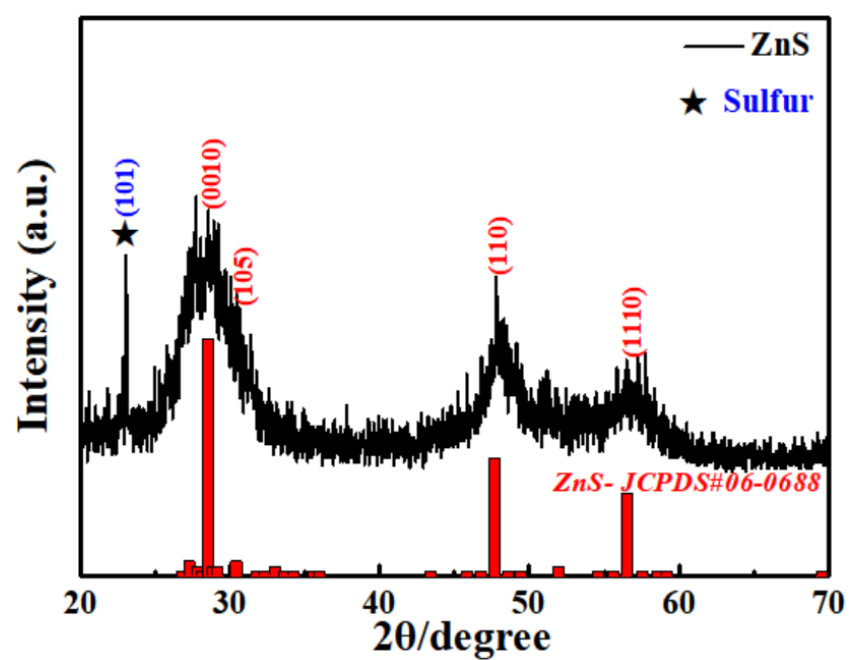

Fig. S10 XRD pattern of plain ZnS.

**Table S1** ICP analysis of NiS<sub>2</sub>/CuS and NiS<sub>2</sub>/ZnS composites.

| Samples               | Cu (Wt %) | Ni (Wt %) | Zn (Wt %) | Atomic molar ratio |
|-----------------------|-----------|-----------|-----------|--------------------|
| NiS <sub>2</sub> /CuS | 30.6      | 14.25     | N         | 1 : 2              |
| NiS <sub>2</sub> /ZnS | N         | 16.48     | 35.98     | 0.49 : 1           |

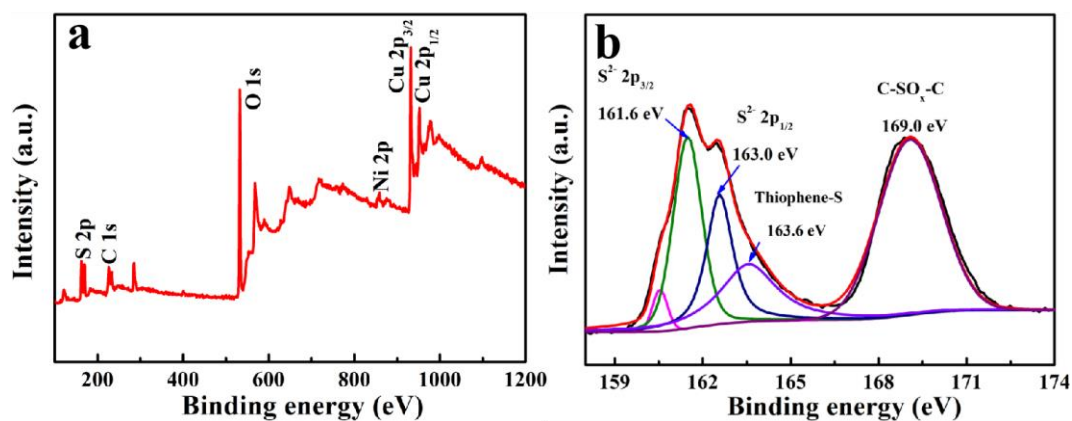

**Fig. S11** XPS survey spectrum (a) and high-resolution S 2p spectrum (b) of yolk-shell NiS<sub>2</sub>/CuS hollow microspheres.

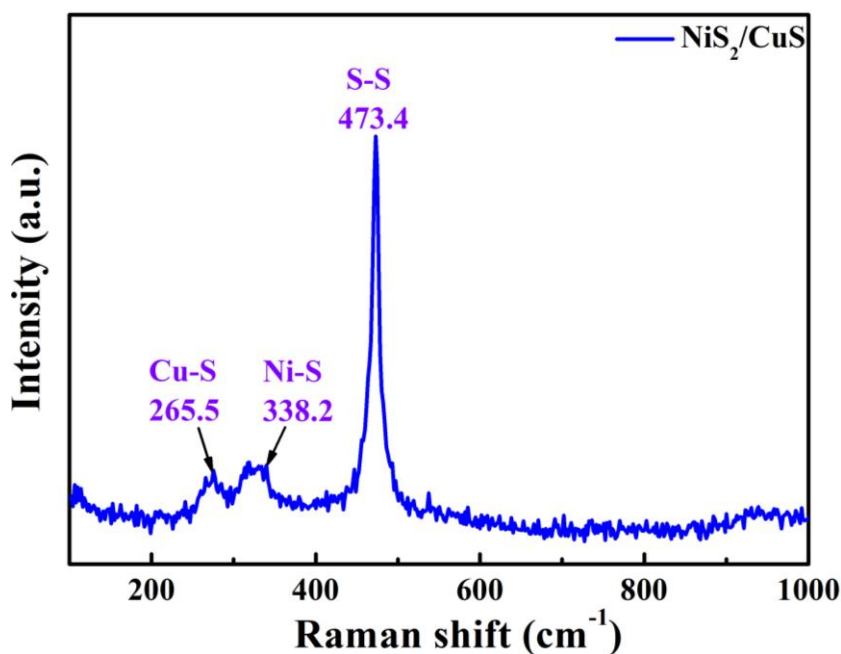

**Fig. S12** Raman spectrum of yolk-shell NiS<sub>2</sub>/CuS hollow microspheres.

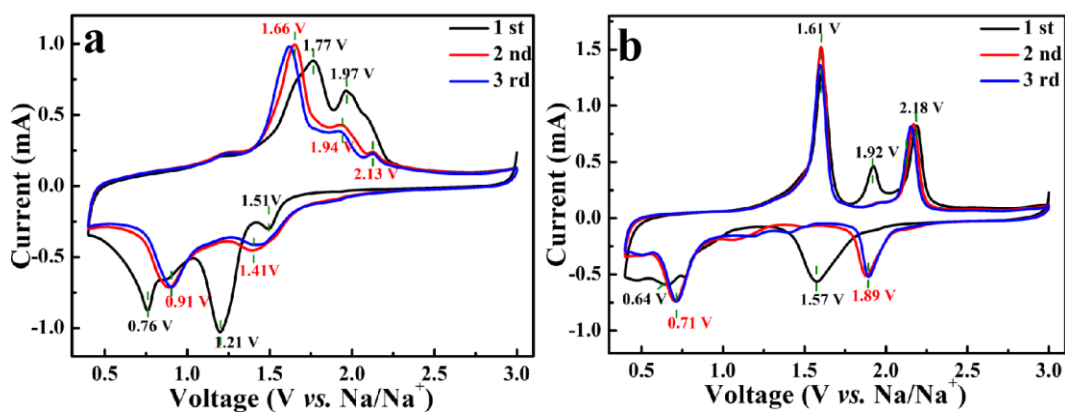

**Fig. S13** The initial three CV curves of plain NiS<sub>2</sub> (a) and CuS (b) electrodes at a rate of 0.5 mV s<sup>-1</sup> in a potential range of 0.4 ~ 3.0 V.

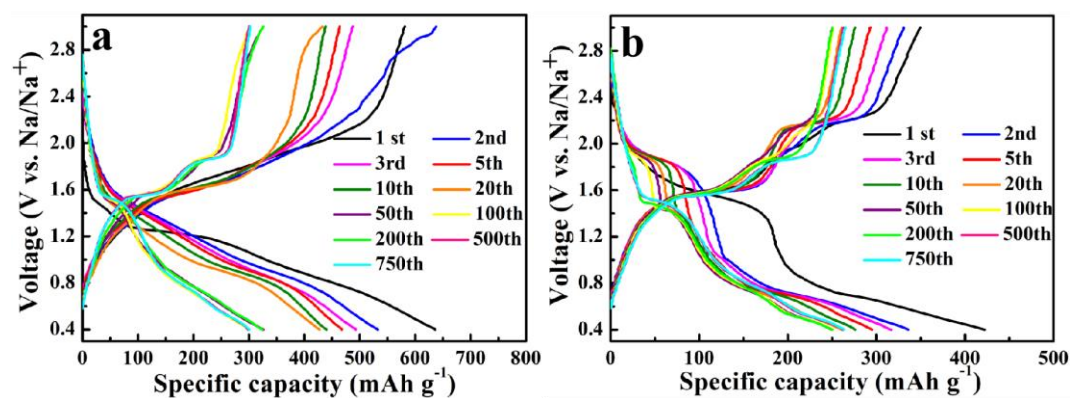

**Fig. S14** The GCD profiles of plain NiS<sub>2</sub> (a) and CuS (b) electrodes at 2 A g<sup>-1</sup> from 1st to 750th cycle in a potential range of 0.4 ~ 3.0 V.



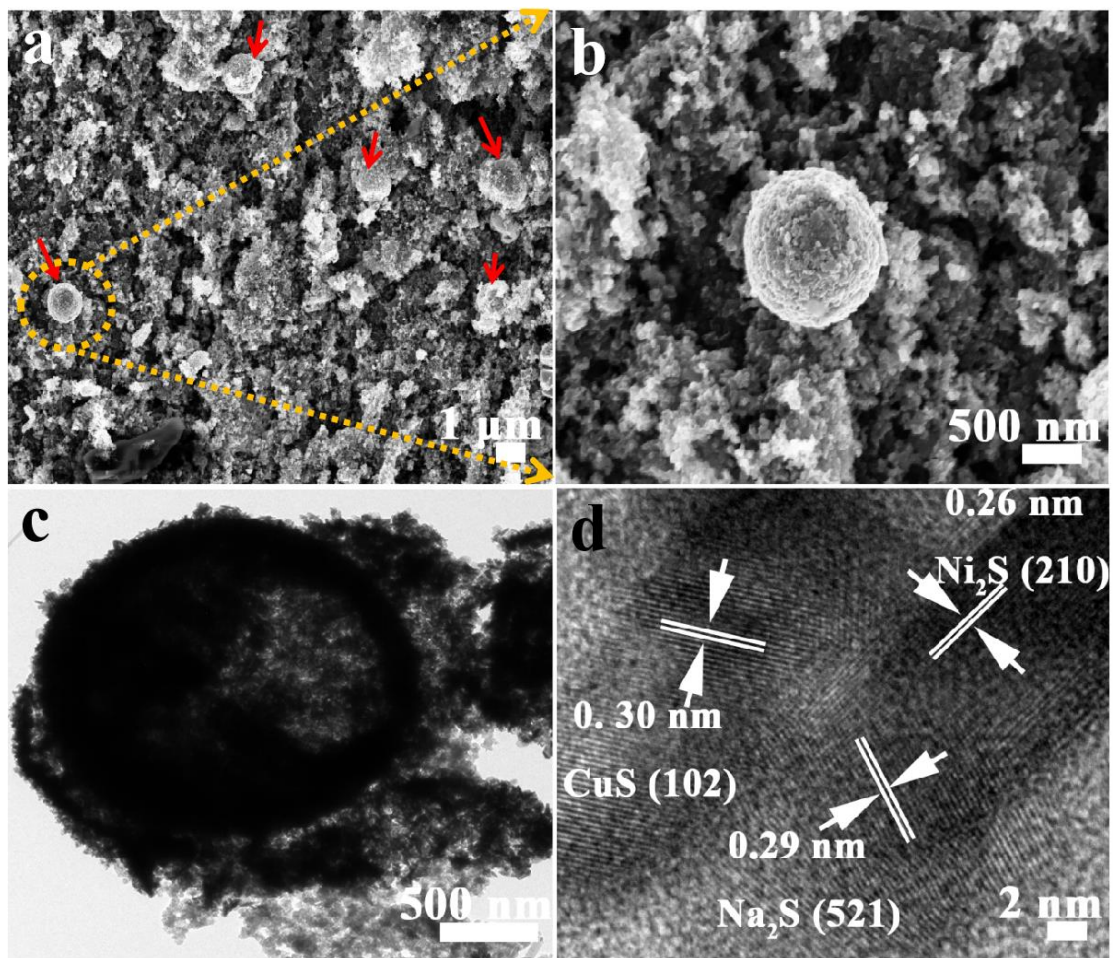

**Fig. S15** The SEM (a, b), TEM (c), and HRTEM (d) images of yolk-shell  $\text{NiS}_2/\text{CuS}$  hollow microspheres after long cycles at  $2.0 \text{ A g}^{-1}$ .

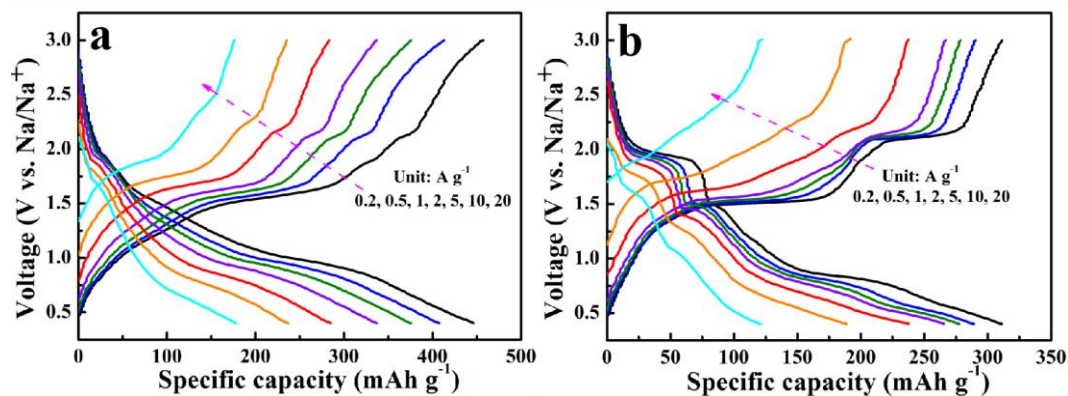

**Fig. S16** The GCD profiles of plain NiS<sub>2</sub> (a) and CuS (b) electrodes at different current rates in a potential range of 0.4 ~ 3.0 V.

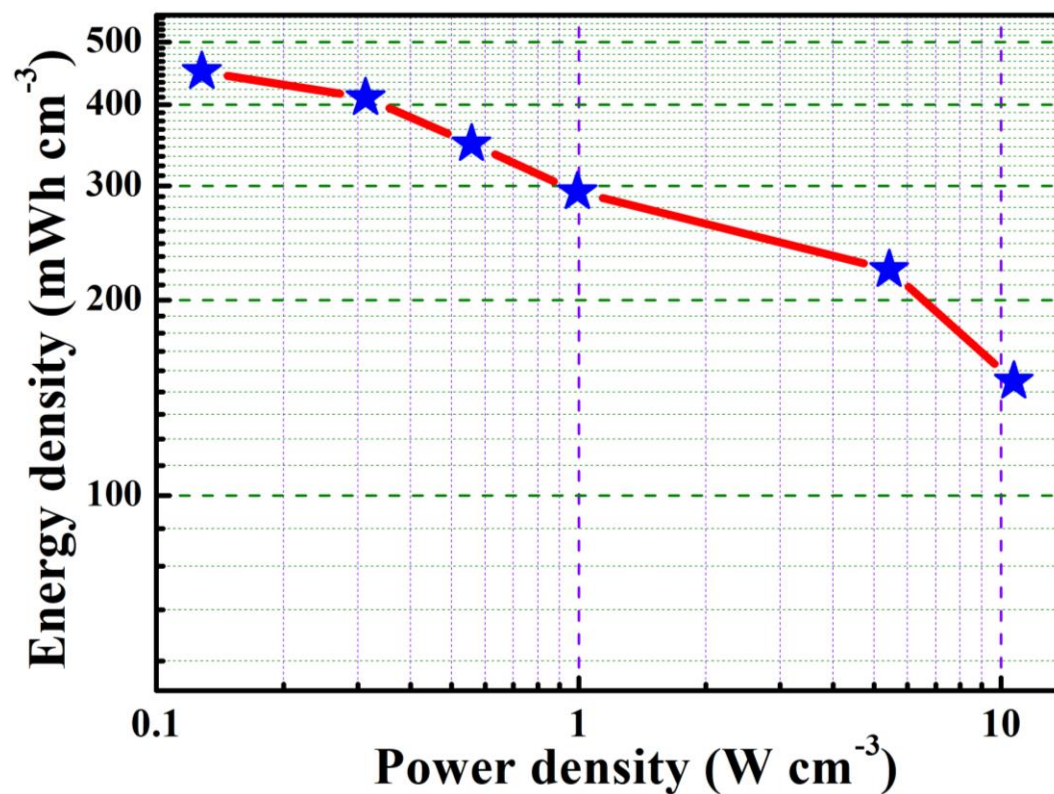

**Fig. S17** Volumetric energy densities of yolk-shell NiS<sub>2</sub>/CuS hollow microspheres at different power densities.

**Table S2** A comparison of cycling performance and reversible specific capacity about NiS<sub>2</sub>- and CuS-based anodes for SIBs.

| Materials                                       | Voltage window (V) | Rate (A g <sup>-1</sup> ) | Cycle number | Capacity (mAh g <sup>-1</sup> ) | Ref.             |
|-------------------------------------------------|--------------------|---------------------------|--------------|---------------------------------|------------------|
| NiS <sub>2</sub> @CoS <sub>2</sub>              | 0.01-3.0           | 1.0                       | 250          | 600.0                           | 1                |
| NiS <sub>2</sub> Nanospheres                    | 0.4-2.9            | 0.5                       | 1000         | 319.0                           | 2                |
| NiS <sub>2</sub> nanoparticles                  | 0.01-3.0           | 2.0                       | 1000         | 140.0                           | 3                |
| pomegranate-like NiS <sub>2</sub> nanoparticles | 0.01-3.0           | 0.5                       | 300          | 356.2                           | 4                |
| hollow NiS <sub>2</sub> spheres                 | 0.01-3.0           | 1.0                       | 300          | 530.0                           | 5                |
| SnS <sub>2</sub> /NiS <sub>2</sub>              | 0.01-3.0           | 2.0                       | 100          | 343.2                           | 6                |
| NiS <sub>2</sub> @C                             | 0.01-3.0           | 0.1                       | 100          | 580.8                           | 7                |
| CuS Microspheres                                | 0.01-3.0           | 10                        | 1000         | 312.5                           | 8                |
| CuS Microspheres                                | 0.6-3.0            | 0.5                       | 500          | 403.0                           | 9                |
| CuS@CoS <sub>2</sub> Double-Shelled Nanoboxes   | 0.4-2.6            | 0.5                       | 500          | 403.0                           | 10               |
| N-Doped CuS@C Nanowires                         | 0.4-3.0            | 2.0                       | 10000        | 216.7                           | 11               |
| Platelet-like CuS                               | 0.4-2.6            | 2.0                       | 500          | 320                             | 12               |
| ZnS/CuS@C                                       | 0.4-3.0            | 10.0                      | 1750         | 282.7                           | 13               |
| Hydrangea-Like CuS                              | 0.4-2.6            | 1.0                       | 400          | 335                             | 14               |
| <b>NiS<sub>2</sub>/CuS</b>                      | <b>0.4-3.0</b>     | <b>10.0</b>               | <b>2150</b>  | <b>371.6</b>                    | <b>This work</b> |
|                                                 |                    | <b>20.0</b>               | <b>4200</b>  | <b>283.4</b>                    |                  |

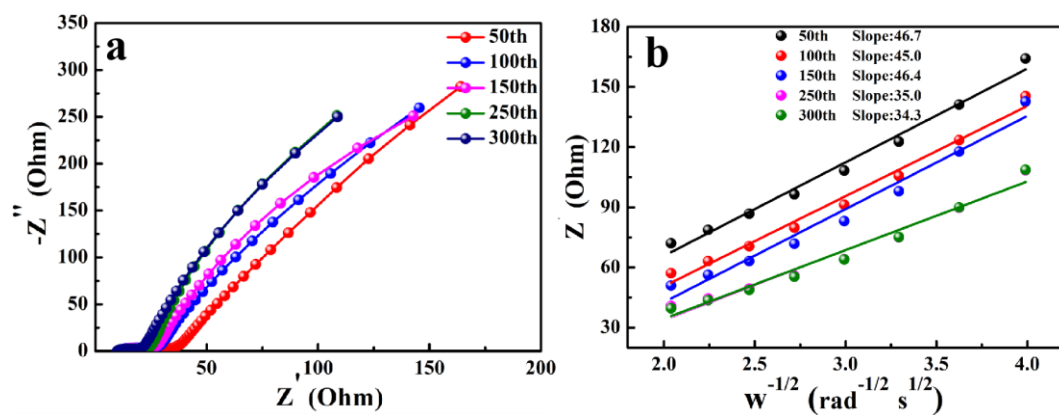

**Fig. S18** Nyquist plots (a) and the linear fitting of  $Z'$  and  $\omega^{-1/2}$  (b) of  $\text{NiS}_2/\text{CuS}$  electrode at different cycles.

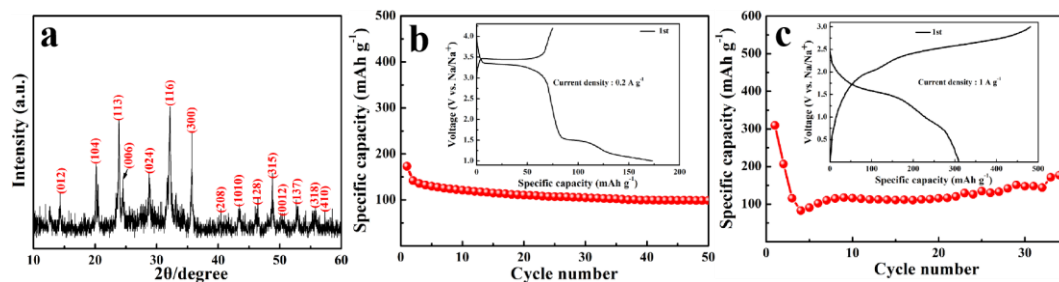

**Fig. S19** (a) The XRD pattern of  $\text{Na}_3\text{V}_2(\text{PO}_4)_3/\text{C}$ . (b) The GCD profiles and cycling performance of  $\text{Na}_3\text{V}_2(\text{PO}_4)_3/\text{C}$  electrode in a potential range of 1.0 to 4.2 V at  $0.2 \text{ A g}^{-1}$ . (c) The GCD profiles and cycling performance of  $\text{Na}_3\text{V}_2(\text{PO}_4)_3/\text{C}/\text{NiS}_2/\text{CuS}$  full cell in a potential range of 0.01 to 3.0 V at  $1.0 \text{ A g}^{-1}$ .

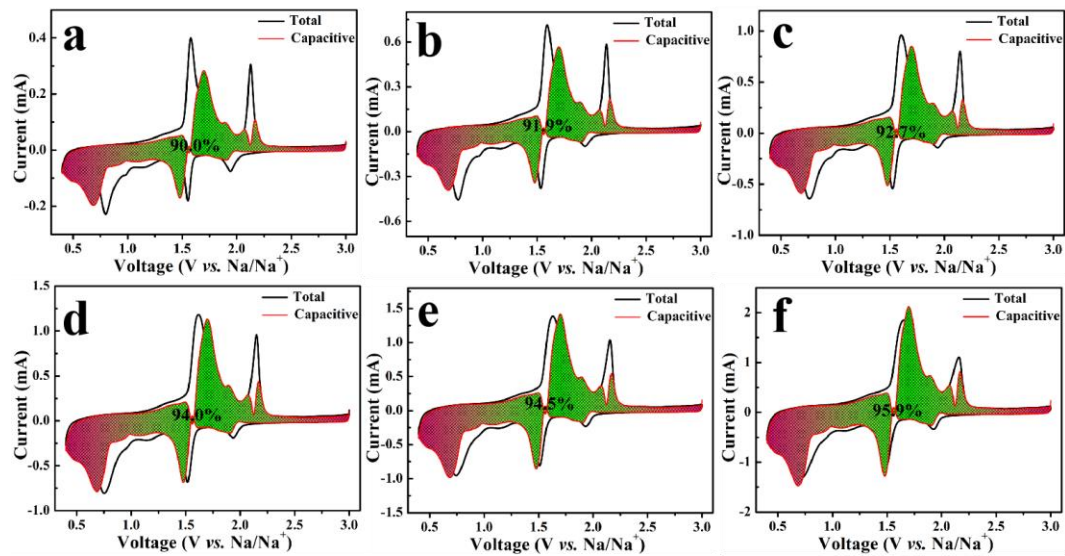

**Fig. S20** The overall capacity versus pseudocapacitive fraction shown by the shaded area for NiS<sub>2</sub>/CuS electrode at various scan rates: (a) 0.2 mV s<sup>-1</sup>; (a) 0.4 mV s<sup>-1</sup>; (b) 0.6 mV s<sup>-1</sup>; (c) 0.8 mV s<sup>-1</sup>; (d) 1.0 mV s<sup>-1</sup>; (e) 1.5 mV s<sup>-1</sup>.

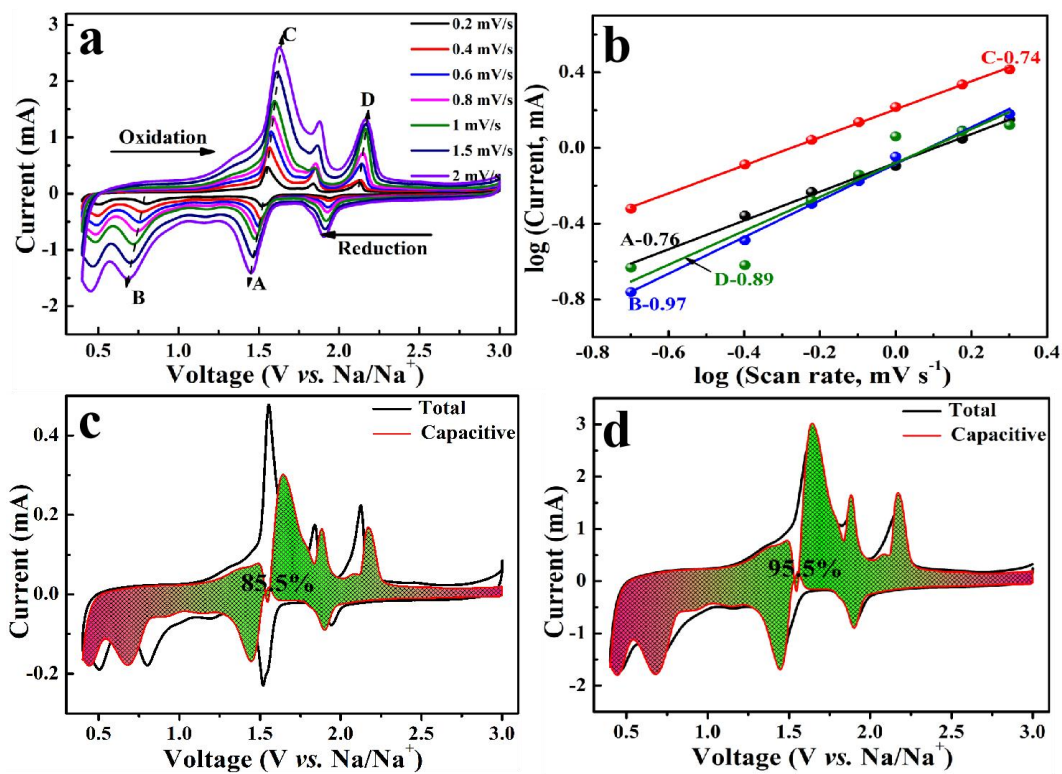

**Fig. S21** (a) CV curves of plain NiS<sub>2</sub> electrode subjected to different scan rates from 0.2 to 2.0 mV s<sup>-1</sup>. (b) The corresponding log (*i*) versus log (*v*) plots at each redox peak current. The overall capacity versus pseudocapacitive fraction shown by the shaded area at 0.2 (c) and 2.0 (d) mV s<sup>-1</sup>.

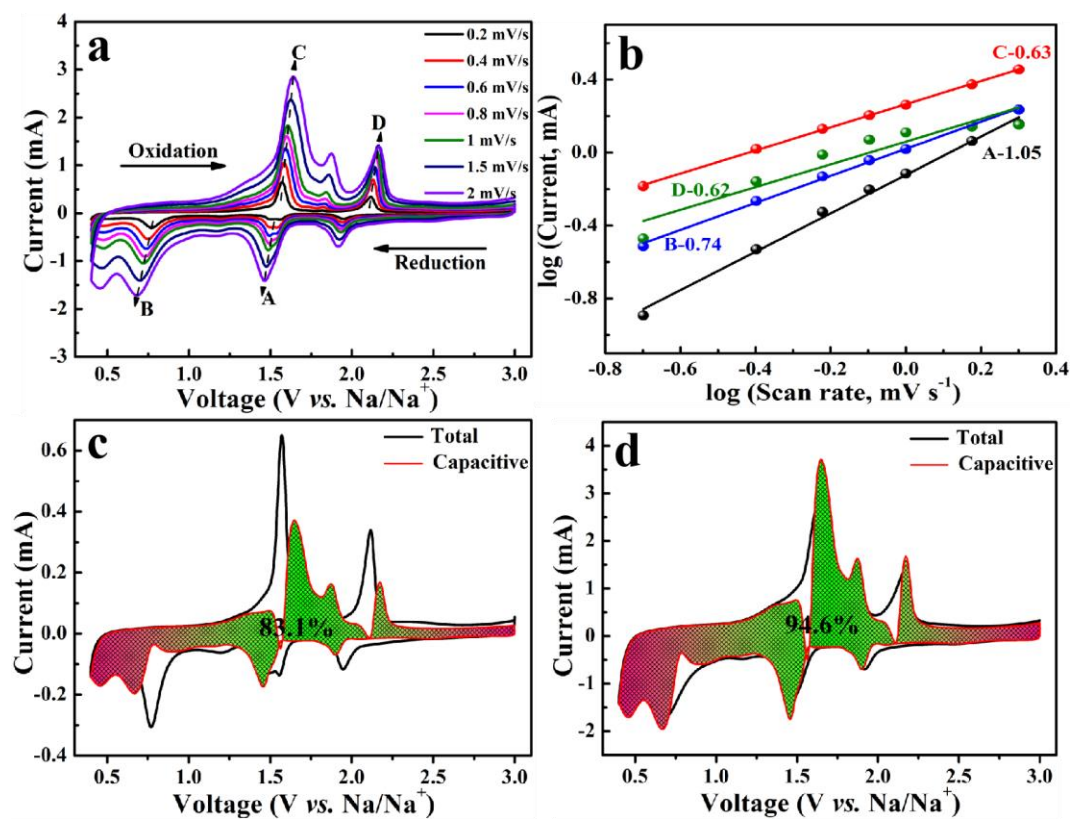

**Fig. S22** (a) CV curves of plain CuS electrode subjected to different scan rates from 0.2 to 2.0  $\text{mV s}^{-1}$ . (b) The corresponding  $\log(i)$  versus  $\log(v)$  plots at each redox peak current. (c) Overall capacity versus pseudocapacitive fraction shown by the shaded area at 2.0  $\text{mV s}^{-1}$ .

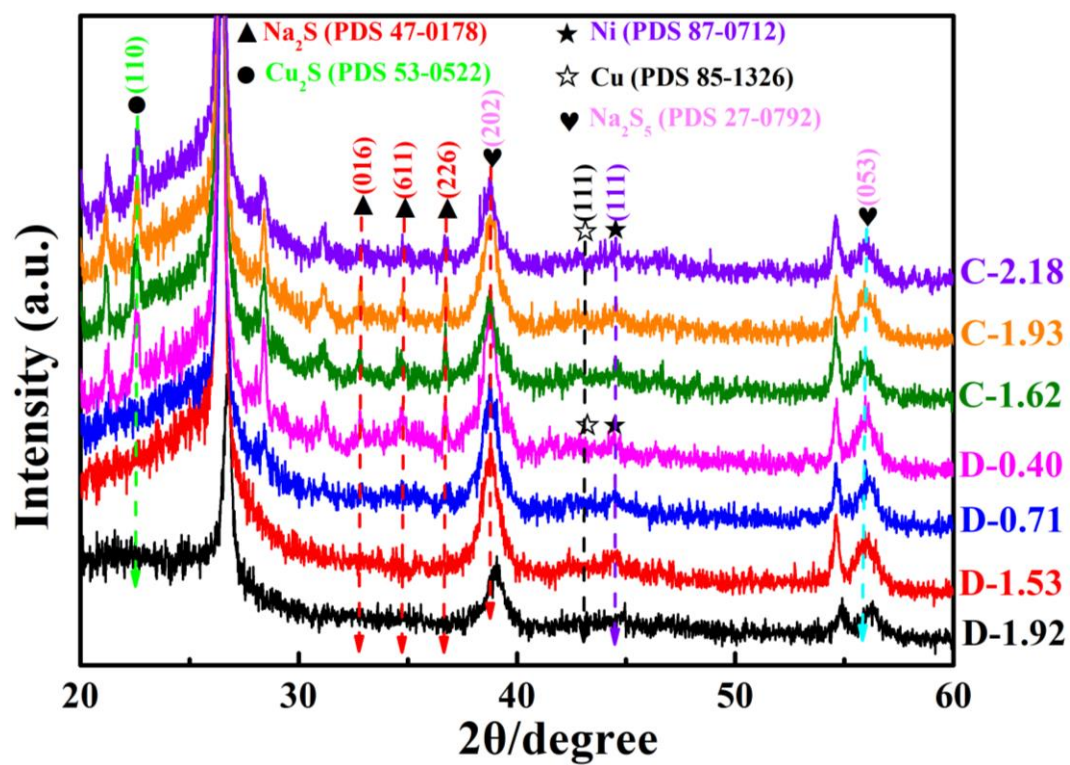

**Fig. S23** The ex-situ XRD patterns of  $\text{NiS}_2/\text{CuS}$  electrode at different discharged and charged states in the second cycle.



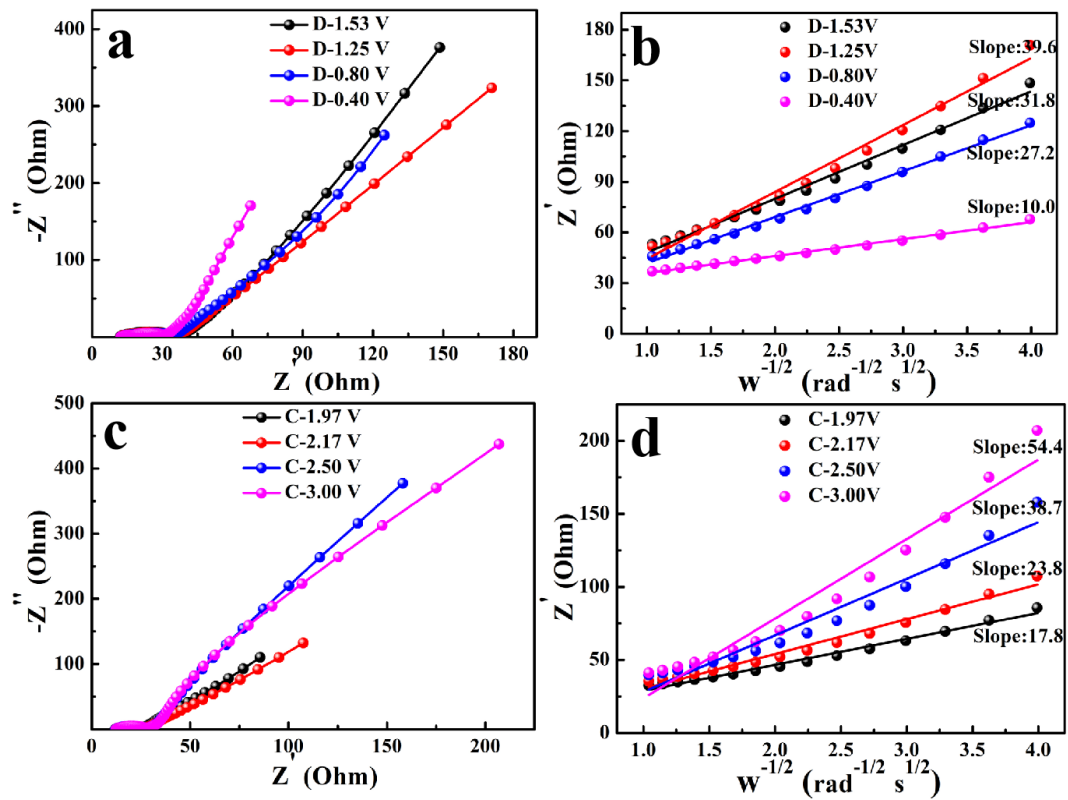

**Fig. S24** Nyquist plots of NiS<sub>2</sub>/CuS electrode at different discharged (a) and charged (c) states. The linear fitting of Z' and  $\omega^{-1/2}$  of NiS<sub>2</sub>/CuS electrode at different discharged (b) and charged (d) states.

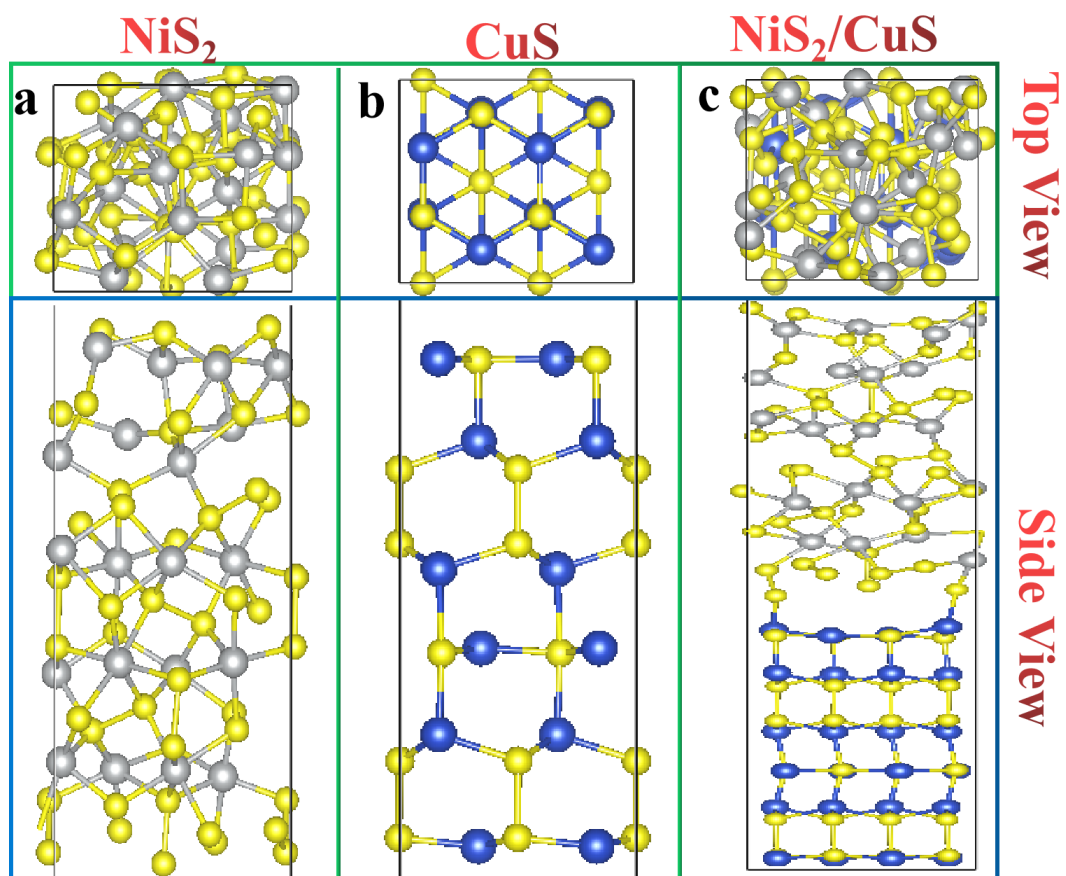

**Fig. S25** Crystal structures of  $\text{NiS}_2$  (a),  $\text{CuS}$  (b) and  $\text{NiS}_2/\text{CuS}$  (c) from top view and side view.

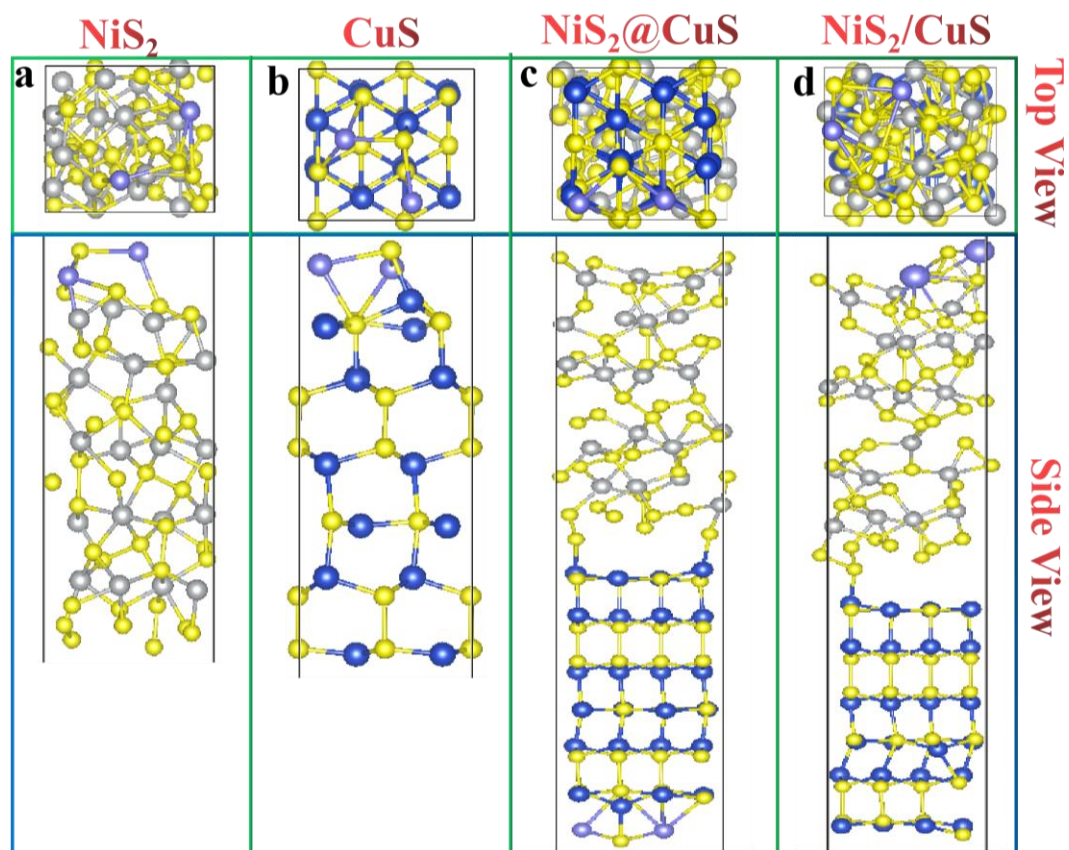

**Fig. S26** The binding energies of  $\text{Na}_2\text{S}$  under the stable adsorption configuration for  $\text{NiS}_2$  (a),  $\text{CuS}$  (b) from top view and side view.  $\text{Na}_2\text{S}$  adsorbed at  $\text{CuS}$  (c) or  $\text{NiS}_2$  (d) crystal of  $\text{NiS}_2/\text{CuS}$  heterojunction from top view and side view.

## References

- 1 Y. M. Lin, Z. Z. Qiu, D. Z. Li, S. Ullah, Y. Hai, H. L. Xin, W. D. Liao, B. Yang, H. S. Fan, J. Xu and C. Z. Zhu, *Energy Storage Mater.*, 2018, **11**, 67–74.
- 2 R. M. Sun, S. J. Liu, Q. L. Wei, J. Z. Sheng, S. H. Zhu, Q. Y. An and L. Q. Mai, *Small*, 2017, **13**, 1701744.
- 3 W. X. Zhao, S. Q. Ci, X. Hu, J. X. Chen and Z. H. Wen, *Nanoscale*, 2019, **11**, 4688–4695.
- 4 J. B. Li, J. L. Li, D. Yan, S. J. Hou, X. T. Xu, T. Lu, Y. F. Yao, W. J. Mai and L. K. Pan, *J. Mater. Chem. A*, 2018, **6**, 6595–6605.
- 5 R. Bi, C. Zeng, H. W. Huang, X. P. Wang and L. Zhang, *J. Mater. Chem. A*, 2018, **6**, 14077–14082.
- 6 S. D. Guan, T. S. Wang, X. L. Fu, L. Z. Fan and Z. J. Peng, *Appl. Surf. Sci.*, 2020, **508**, 145241.
- 7 G. G. Zhao, Y. Zhang, L. Yang, Y. L. Jiang, Y. Zhang, W. W. Hong, Y. Tian, H. B. Zhao, J. G. Hu, L. Zhou, H. S. Hou, X. B. Ji and L. Q. Mai, *Adv. Funct. Mater.*, 2018, **28**, 1803690.
- 8 Y. H. Xiao, D. C. Su, X. Z. Wang, S. D. Wu, L. M. Zhou, Y. Shi, S. M. Fang, H. M. Cheng and F. Li, *Adv. Energy Mater.*, 2018, **8**, 1800930.
- 9 H. Li, Y. H. Wang, J. L. Jiang, Y. Y. Zhang, Y. Y. Peng and J. B. Zhao, *Electrochim. Acta*, 2017, **247**, 851–859.
- 10 Y. J. Fang, B. Y. Guan, D. Y. Luan and X. W. Lou, *Angew. Chem., Int. Ed.*, 2019, **131**, 7821–7825.
- 11 D. Zhao, M. M. Yin, C. H. Feng, K. Zhan, Q. Z. Jiao, H. S. Li and Y. Zhao, *ACS Sustainable Chem. Eng.*, 2020, **8**, 11317–11327.
- 12 Z. G. Yang, Z. G. Wu, J. Liu, Y. X. Liu, S. Y. Gao, J. A. Wang, Y. Xiao, Y. J. Zhong, B. H. Zhong and X. D. Guo, *J. Mater. Chem. A*, 2020, **8**, 8049–8057.
- 13 W. X. Zhao, L. X. Gao, L. C. Yue, X. Y. Wang, Q. Liu, Y. L. Luo, T. S. Li, X. F. Shi, A. M. Asiri and X. P. Sun, *J. Mater. Chem. A*, 2021, **9**, 6402–6412.
- 14 Z. G. Yang, Z. G. Wu, W. B. Hua, Y. Xiao, G. K. Wang, Y. X. Liu, C. J. Wu, Y. C. Li, B. H. Zhong, W. Xiang, Y. J. Zhong and X. D. Guo, *Adv. Sci.*, 2020, **7**, 1903279.
